# Supplementary material for: Subjective Deterioration of Physical and Psychological Health during the COVID-19 Pandemic in Taiwan: Their Association with the Adoption of Protective Behaviors and Mental Health Problems
Source: MDPI journal article supplement (doi:10.3390/ijerph17186827), 2020-09-18
Supplement: s1 [file s1]

# Supplementary Table S1

## Measures Used in This Study

| Measure                                   | Item                                                                                                                            | Response scale                                                                                                                                      | Dichotomous scale                                                                                                                    |
|-------------------------------------------|---------------------------------------------------------------------------------------------------------------------------------|-----------------------------------------------------------------------------------------------------------------------------------------------------|--------------------------------------------------------------------------------------------------------------------------------------|
| Self-reported physical health status      | How is the state of your physical health compared with other people before the COVID-19 pandemic (in the recent week)?          | 1 = much worse, 2 = mildly worse, 3 = the same, 4 = mildly better, 5 = much better                                                                  |                                                                                                                                      |
| Self-reported psychological health status | How is the state of your psychological health compared with other people before the COVID-19 pandemic (in the recent week)?     | 1 = much worse, 2 = mildly worse, 3 = the same, 4 = mildly better, 5 = much better                                                                  |                                                                                                                                      |
| Cognitive construct of health beliefs     | Item 1: What do you think are your chances of contracting COVID-19 over the next month compared with those outside your family? | 1 = no chance of contracting COVID-19, 2 = very unlikely, 3 = unlikely, 4 = evens, 5 = likely, 6 = very likely, 7 = guaranteed to contract COVID-19 | 0 = low perceived susceptibility (score < 5)<br>1 = high perceived susceptibility (score ≥ 5)                                        |
|                                           | Item 2: How serious is COVID-19 relative to SARS?                                                                               | 1 = much less serious, 2 = less serious, 3 = similar, 4 = more serious, 5 = much more serious                                                       | 0 = perceived harm of COVID-19 less than or similar to SARS (score < 4)<br>1 = perceived harm of COVID-19 more than SARS (score ≥ 4) |
|                                           | Item 3: Do you think you have sufficient knowledge and information on COVID-19?                                                 | 0 = Insufficient, 1 = sufficient                                                                                                                    |                                                                                                                                      |

|                                                        |                                                                                                                                                  |                                                                                               |                                                                                                                         |
|--------------------------------------------------------|--------------------------------------------------------------------------------------------------------------------------------------------------|-----------------------------------------------------------------------------------------------|-------------------------------------------------------------------------------------------------------------------------|
|                                                        | Item 4: How confident are you that you can cope with COVID-19?                                                                                   | 1 = not confident at all, 2 = mildly unconfident, 3 = fair, 4 = confident, 5 = very confident | 0 = low confidence in coping with COVID-19 (score < 3)<br>1 = high confidence in coping with COVID-19 (score ≥ 3)       |
| Affective construct of health beliefs                  | Please rate how worried you are about COVID-19:                                                                                                  | Scores ranged from 1 to 10 (1 = very mild, 10 = very severe)                                  | 0 = low worry about COVID-19 (score < 6)<br>1 = high worry about COVID-19 (score ≥ 6)                                   |
| Perceived social support (total score of items 1 to 3) | In the past 7 days, were you satisfied with the support from your 1) family, 2) friends, and 3) colleagues or classmates?                        | 0 = not satisfied at all, 1 = mildly unsatisfied, 2 = fair, 3 = satisfied, 4 = very satisfied |                                                                                                                         |
| Adoption of protective behaviors                       | In the past week, did you 1) avoid going to crowded places, 2) wash your hands more often, and 3) wear a mask more often?                        | 0 = no, 1 = yes, but not due to COVID-19, 2 = yes, due to COVID-19                            | 0 = no (score ≤ 1)<br>1 = yes (score = 2)                                                                               |
| General anxiety                                        | Agreement on 10 statements: I feel rested /content/comfortable/relaxed/pleasant/anxious/nervous/jittery/“high strung”/over-excited and “rattled” | 1 = not at all, 2 = sometimes, 3 = moderately so, 4 = very                                    | 0 = low general anxiety (total score ≤ median score [23])<br>1 = high general anxiety (total score > median score [23]) |
| Sleep problems                                         | In the past week, did you have sleep problems?                                                                                                   | 0 = never, 1 = mild, 2 = moderate, 3 = severe, 4 = extremely severe                           | 0 = no sleep problem (score = 0)<br>1 = sleep problems (score > 0)                                                      |
| Suicidal ideation                                      | In the past week, did you ever have suicidal thoughts?                                                                                           | 0 = never, 1 = mild, 2 = moderate, 3 = severe, 4 = extremely severe                           | 0 = no suicidal ideation (score = 0)<br>1 = suicidal ideation (score > 0)                                               |
